# Supplementary material
Source: PubMed Central journal article supplement (PMC7667957)
Supplement: supp_RA120.015541_162740_1_supp_588789_qfsvlb.pdf [file supp_RA120.015541_162740_1_supp_588789_qfsvlb.pdf]

## **Supporting Information**

### **An autoinhibitory role for the GRF zinc finger domain of DNA glycosylase NEIL3**

Alyssa A. Rodriguez<sup>1</sup>, Jessica L. Wojtaszek<sup>2</sup>, Briana Greer<sup>1</sup>, Tuhin Haldar<sup>3</sup>, Kent S. Gates<sup>3</sup>, R. Scott Williams<sup>2\*</sup>, and Brandt F. Eichman<sup>1\*</sup>

**Table S1.** DNA substrates composition from glycosylase assays

| Substrate                                                                                               | Length (nt) | Sequence (5'-3')                                                                                                                  |
|---------------------------------------------------------------------------------------------------------|-------------|-----------------------------------------------------------------------------------------------------------------------------------|
| <b>EMSA and fluorescence anisotropy</b>                                                                 |             |                                                                                                                                   |
| ssDNA                                                                                                   | 10          | FAM-CTCAGGACTC                                                                                                                    |
| ssDNA                                                                                                   | 20          | FAM-CTCAGGACTCAGTTCGTCAG                                                                                                          |
| ssDNA                                                                                                   | 30          | FAM-CTCAGGACTCAGTTCGTCAGCCCTTGACAG                                                                                                |
| ssDNA                                                                                                   | 40          | FAM-CTCAGGACTCAGTTCGTCAGCCCTTGACAGCGATGGAAGC                                                                                      |
| dsDNA                                                                                                   | 40          | 1: FAM-CTCAGGACTCAGTTCGTCAGCCCTTGACAGCGATGGAAGC<br>2: GCTTCCATCGCTGTCAAGGGCTGACGAACTGAGTCCTGAG                                    |
| Fork                                                                                                    | 40          | 1: FAM-CTCAGGACTCAGTTCGTCAG <u>CCCTTGACAGCGATGGAAGC</u><br>2: <u>CGAAGGTAGCGACAGTTC</u> CCCTGACGAACTGAGTCCTGAG                    |
| <b>Glycosylase assays</b>                                                                               |             |                                                                                                                                   |
| ssDNA                                                                                                   | 25          | FAM-GACCACTACACC(DHT)ATTCCTTACAAC                                                                                                 |
| Lead DHT fork                                                                                           | 25          | 1: FAM-GACCACTACACC(DHT) <u>ATTCCTTACAAC</u><br>2: <u>CAACATTCCTTA</u> <u>A</u> GGTGTAGTGGTC                                      |
| Lag DHT fork                                                                                            | 25          | 1: FAM- <u>GACCACTACACC</u> (DHT)ATTCCTTACAAC<br>2: GTTGTAAAGGAATA <u>CCACATCACCAG</u>                                            |
| Lead AP-ICL fork                                                                                        | 39          | 1: FAM-CCTTCAACCACCGCTCAACTC( <u>AP</u> )TG <u>AACTGCAGTCTGGTT</u><br>2: <u>CCGTTCCGGTAGCGG</u> <u>CA</u> AAGAGTTGAGCGGTGGTTGAAGG |
| Lag AP-ICL fork                                                                                         | 39          | 1: FAM- <u>ATGGTCTGACGTGAATC</u> (AP)TGCAACTCGCCACCAACTTCC<br>2: GGAAGTTGGTGGCGAGTTGCA <u>AGTGGGGATGGCCTTCCC</u>                  |
| FAM, 6-carboxyfluorescein. Non-base-paired regions are shown in red. Damaged base pairs are underlined. |             |                                                                                                                                   |

## Supplemental Figures

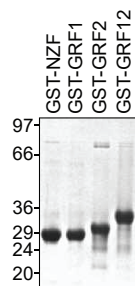

**Fig. S1.** Coomassie-stained SDS-PAGE gel of purified GST proteins used experiments shown in Fig. 1 and Fig. 2G.

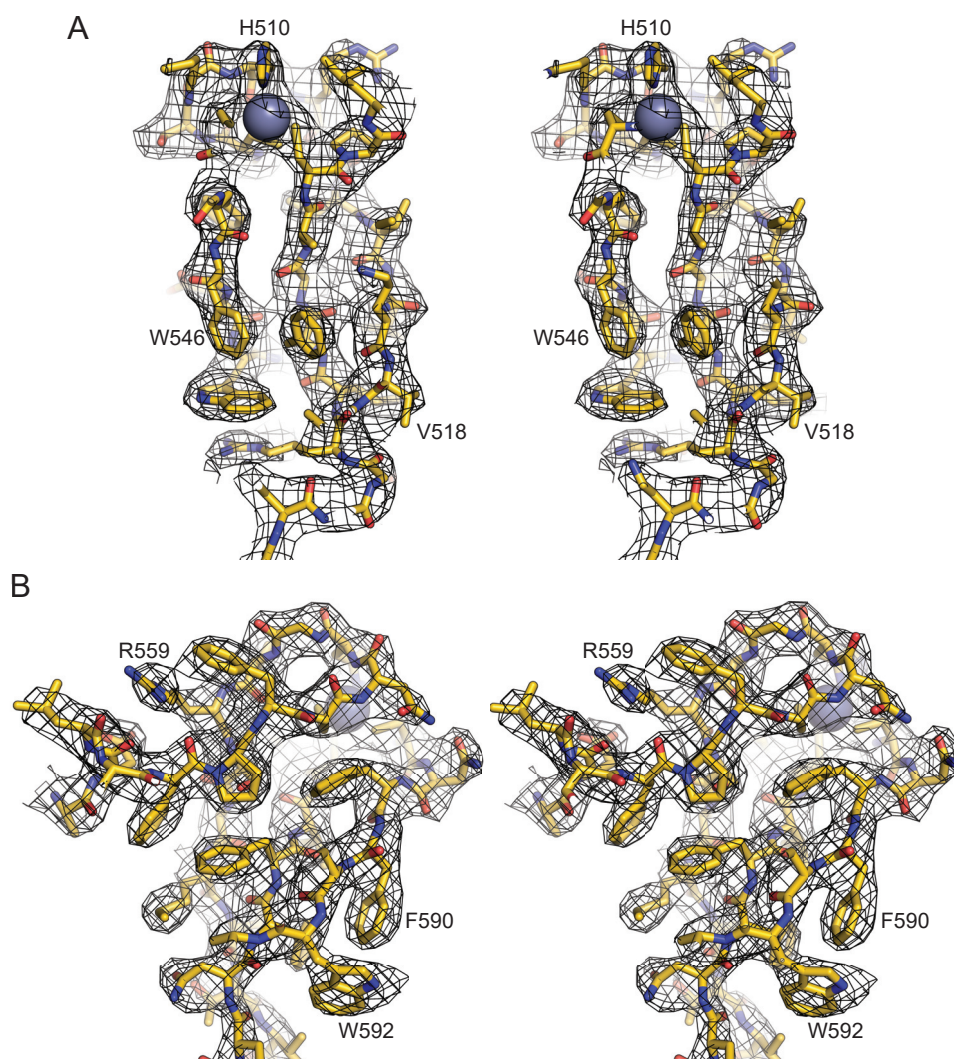

**Fig. S2.** Stereoimages of representative regions of the refined model superimposed onto 2Fo-Fc electron density (contoured to 1 $\sigma$ ). Labeled residues are for orientation purposes only. **A.** GRF1. **B.** GRF2.

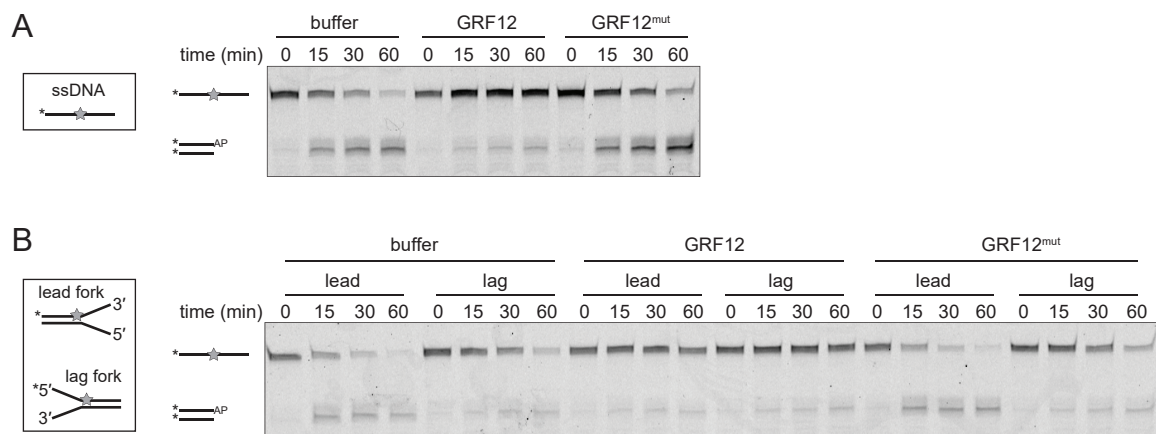

**Fig. S3.** Representative gels used for data shown in Fig. 5. Glycosylase assays for GRF12 inhibition of 5,6-dihydrothymine in ssDNA (A) and forked substrates (B).
